# Supplementary material
Source: PubMed Central journal article supplement (PMC5481513)

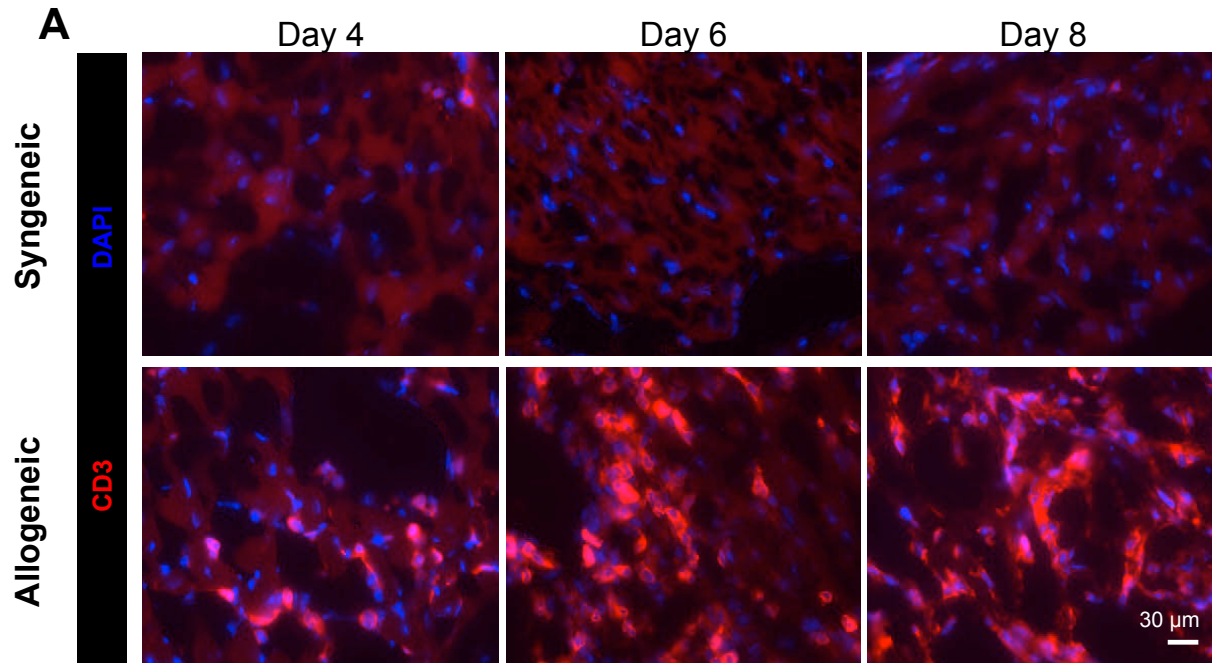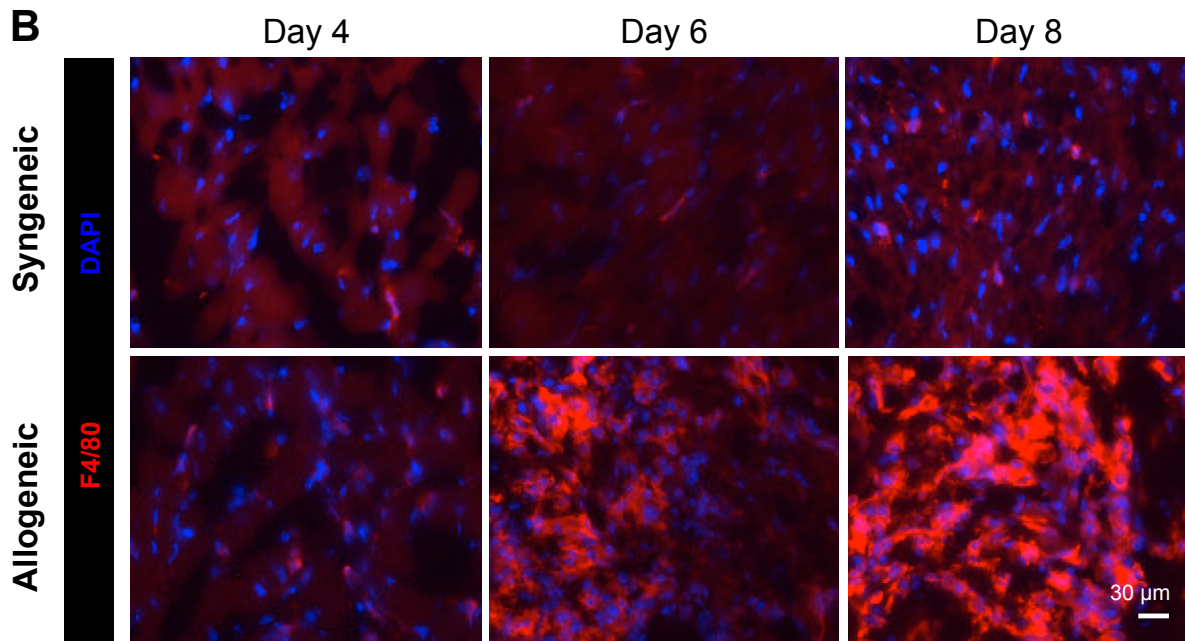

Supplemental Figure 1. Fischer et al.

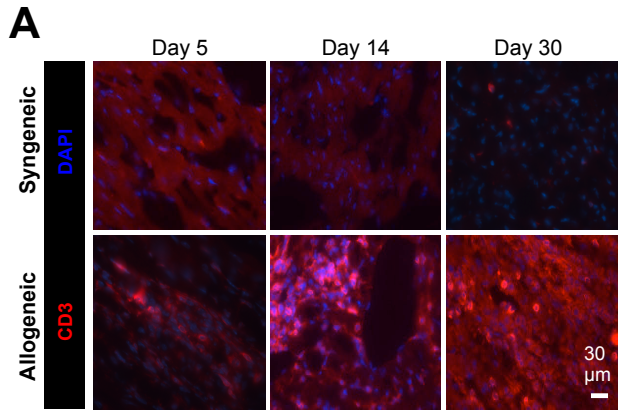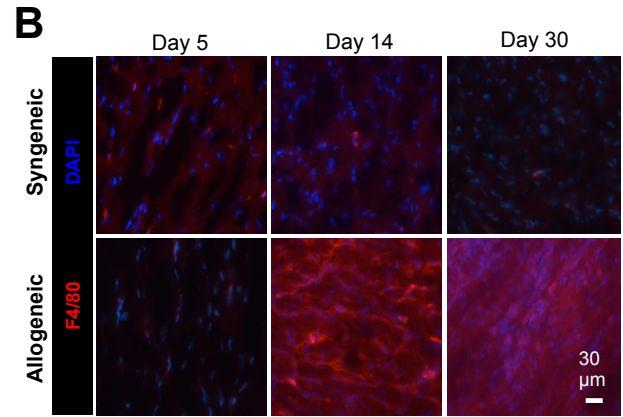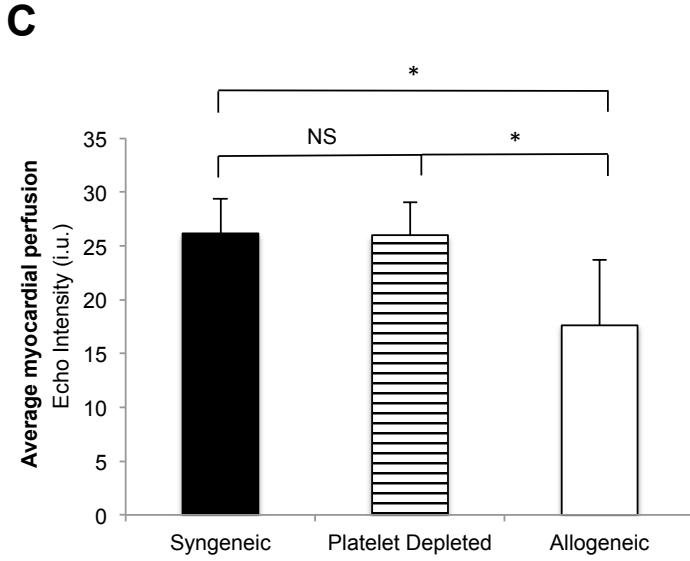

Supplement: NIHMS839508-supplement-Supp_Fig_S1-S2.pdf [file NIHMS839508-supplement-Supp_Fig_S1-S2.pdf]
